# Supplementary material
Source: PubMed Central journal article supplement (PMC2757812)
Supplement: 0909115106_Appendix_PDF.pdf [file 0909115106_Appendix_PDF.pdf]

# Supporting Information — A mathematical model of ischemic cutaneous wounds

Chuan Xue, Avner Friedman, and Chandan K. Sen

## A Reduction of Equation [5] to Equation [6]

For an upper convected Maxwell fluid, the stress-strain relationship is given by Equation [5],

$$\lambda \left( \frac{D\tau}{Dt} - (\nabla \cdot \mathbf{v})\tau - \tau(\nabla \cdot \mathbf{v})^T \right) + \tau = \eta(\nabla \mathbf{v} + \nabla \mathbf{v}^T),$$

where  $\eta$  is the shear viscosity,  $G$  is the shear modulus and  $\lambda = \frac{\eta}{G}$  is the relaxation time of the Maxwell element. For collagen I,  $\eta = 1.1 \times 10^8$  dyn · s/cm<sup>2</sup>,  $G = 1.5 \times 10^4$  dyn/cm<sup>2</sup> (1,2), therefore  $\lambda \sim 7.3 \times 10^3$  sec  $\sim 2h$ . We assume that  $\lambda \nabla \cdot \mathbf{v}$  and  $\lambda \frac{D\tau}{Dt}$  are small and can be neglected, so that the stress-strain relationship [5] simplifies to Equation [6]

$$\tau = \eta(\nabla \mathbf{v} + \nabla \mathbf{v}^T).$$

To justify the simplification, we nondimensionalize Equation [5] with the characteristic space and time scales in wound healing,  $L_0 = 1$  cm,  $T_0 = 5$  day. The nondimensionalized variables are

$$x' = \frac{x}{L}, \quad t' = \frac{t}{T}, \quad \lambda' = \frac{\lambda}{T}, \quad \mathbf{v}' = \frac{\mathbf{v}}{L/T} \sim \mathcal{O}(1), \quad \tau' = \frac{\tau}{\eta/T},$$

in these variables the stress-strain relationship becomes

$$\lambda' \left( \frac{D\tau'}{Dt'} - (\nabla' \cdot \mathbf{v}')\tau' - \tau'(\nabla' \cdot \mathbf{v}')^T \right) + \tau' = (\nabla' \mathbf{v}' + \nabla' \mathbf{v}'^T), \quad (\text{A.1})$$

During wound healing  $\nabla' \cdot \mathbf{v}' \sim \mathcal{O}(1)$  and  $\nabla' v' \sim \mathcal{O}(1)$ . Since  $\lambda' \approx \frac{1}{60} \ll 1$ , the terms  $\lambda'(\nabla' \cdot \mathbf{v}')\tau'$  and  $\lambda'\tau'(\nabla' \cdot \mathbf{v}')^T$  are negligible, and from  $\lambda' \frac{D\tau'}{Dt'} + \tau' = \mathcal{O}(1)$  we see that the term  $\lambda' \frac{D\tau'}{Dt'}$  may also be neglected, which leads to Equation [6].

## B Derivation of Equations [7] – [10] and [12] under radially symmetry

The equations for the ECM are [1], [3] together with the relations [2], [4], [6]. In this section we derive these equations in polar coordinates  $(r, \theta)$  under the assumption of radial symmetry.

Set

$$\rho = \rho(r), \quad \mathbf{v} = v\mathbf{e}_r, \quad P = P(\rho(r)),$$

then

$$\nabla v = \begin{pmatrix} \frac{\partial v}{\partial r} & 0 \\ 0 & \frac{v}{r} \end{pmatrix}.$$

Writing the stress tensor  $\tau$  in polar coordinates

$$\tau = \begin{pmatrix} \tau_{rr} & \tau_{r\theta} \\ \tau_{\theta r} & \tau_{\theta\theta} \end{pmatrix},$$

Equation [6] becomes

$$\begin{pmatrix} \tau_{rr} & \tau_{r\theta} \\ \tau_{\theta r} & \tau_{\theta\theta} \end{pmatrix} = 2\eta \begin{pmatrix} \frac{\partial v}{\partial r} & 0 \\ 0 & \frac{v}{r} \end{pmatrix},$$

so that

$$\tau_{r\theta} = \tau_{\theta r} = 0,$$

which means that there is no shear stress between neighboring radial sections and annulus. Setting  $\tau_1 = \tau_{rr}$  and  $\tau_2 = \tau_{\theta\theta}$ , we obtain

$$\tau_1 = 2\eta \frac{\partial v}{\partial r}, \quad \tau_2 = 2\eta \frac{v}{r}.$$

By substituting this into the equation  $\sigma \equiv -PI + \tau$ , we obtain

$$\sigma = \begin{pmatrix} \sigma_1 & 0 \\ 0 & \sigma_2 \end{pmatrix}, \quad \text{where } \sigma_1 = -P + \tau_1, \quad \sigma_2 = -P + \tau_2.$$

Equation [3] in polar coordinates reduces to (see, for instance, the appendix of (3))

$$-\frac{\partial P}{\partial r} + \frac{1}{r} \frac{\partial}{\partial r}(r\tau_1) - \frac{\tau_2}{r} = 0.$$

Substituting the forms of  $\tau_i$  into the last equation, we obtain

$$-\frac{\partial P}{\partial r} + 2\eta \frac{1}{r} \frac{\partial}{\partial r}\left(r \frac{\partial v}{\partial r}\right) - 2\eta \frac{v}{r^2} = 0,$$

or

$$\frac{1}{r} \frac{\partial}{\partial r}\left(r \frac{\partial v}{\partial r}\right) - \frac{v}{r^2} = \frac{1}{2\eta} \frac{\partial P}{\partial r}.$$

At the fixed boundary the tissue velocity is assumed to be zero, i.e.,  $\mathbf{v} = 0$  at  $r = L$ . Therefore the equation for  $\rho$  becomes an ODE and no boundary condition is needed. We assume that there is no external force at the free boundary, that is,  $\sigma \cdot \nu = 0$ , where  $\nu$  is the outward normal vector to the free boundary. Under the assumption of radial symmetry,  $\nu = -\mathbf{e}_r$ , and  $\sigma \cdot \nu = -\sigma \cdot \mathbf{e}_r = -\sigma_1$ , so that  $-P + \tau_1 = \sigma_1 = 0$ . Since  $\tau_1 = 2\eta \frac{\partial v}{\partial r}$ , we obtain the boundary condition  $\frac{\partial v}{\partial r} = \frac{P}{2\eta}$  at  $r = R(t)$ . This way we derived the equations

$$\frac{\partial \rho}{\partial t} + \frac{1}{r} \frac{\partial}{\partial r}(r\rho v) = \frac{k_\rho w}{w + K_{w\rho}} f\left(1 - \frac{\rho}{\rho_m}\right) - \lambda_\rho \rho \quad \text{for } R(t) \leq r \leq L \quad (\text{B.1})$$

$$\frac{1}{r} \frac{\partial}{\partial r}\left(r \frac{\partial v}{\partial r}\right) - \frac{v}{r^2} = \frac{1}{2\eta} \frac{\partial P}{\partial r} \quad \text{for } R(t) \leq r \leq L \quad (\text{B.2})$$

$$v = 0 \quad \text{at } r = L, \quad (\text{B.3})$$

$$\frac{\partial v}{\partial r} = \frac{P}{2\eta} \quad \text{at } r = R(t). \quad (\text{B.4})$$

The constitutive equations for the cells and chemicals are given by

$$\frac{\partial u}{\partial t} = -\nabla \cdot (\mathbf{J}_u) + G_u,$$

with

$$\mathbf{J}_u = \mathbf{J}_u^c + \mathbf{J}_u^a, \quad \mathbf{J}_u^c = \mathbf{v}u,$$

From the radial symmetry assumption, we have  $\mathbf{J}_u \cdot \mathbf{e}_\theta = \mathbf{J}_u^c \cdot \mathbf{e}_\theta = \mathbf{J}_u^a \cdot \mathbf{e}_\theta = 0$ , so that  $\mathbf{J}_u = J_u \mathbf{e}_r = J_u^c \mathbf{e}_r + J_u^a \mathbf{e}_r$  with  $J_u^c = vu$ . Therefore the constitutive equation becomes

$$\frac{\partial u}{\partial t} + \frac{1}{r} \frac{\partial}{\partial r} (ruv) = -\frac{1}{r} \frac{\partial}{\partial r} J_u^a + G_u.$$

At the free boundary,  $r = R(t)$ , there is no lost or gain of cells or chemicals, so no-flux (or Neumann) boundary conditions are imposed. With a moving boundary, the Neumann boundary condition becomes

$$\mathbf{J}_u \cdot \mathbf{e}_r - \dot{R}(t)u = 0.$$

Since  $\mathbf{J}_u^c \cdot \mathbf{e}_r = (\mathbf{v} \cdot \mathbf{e}_r)u = vu = \dot{R}(t)u$  at the free boundary, this condition simplifies to

$$J_u^a = 0. \tag{B.5}$$

## C Nondimensionalization and front-fixing transformation

We nondimensionalize the model equations by taking

$$\begin{aligned} r' &= \frac{r}{L_0}, & t' &= \frac{t}{T_0}, & \rho' &= \frac{\rho}{\rho_0}, & \mathbf{v}' &= \frac{\mathbf{v}}{L_0/T_0}, & P' &= \frac{P}{\eta/T_0}, & R' &= \frac{R}{L_0}, \\ w' &= \frac{w}{w_0}, & e' &= \frac{e}{K_e}, & p' &= \frac{p}{K_p}, & m' &= \frac{m}{m_0}, & f' &= \frac{f}{f_0}, & n' &= \frac{n}{b_0}, & b' &= \frac{b}{b_0}, \end{aligned}$$

where  $L_0 = 0.15$  cm,  $T_0 = 6.25$  h, and  $\rho_0, w_0, f_0, b_0$  are the healthy tissue steady state values and  $m_0$  is the inactivated macrophage density. Note that the  $L_0$  and  $T_0$  chosen here are different from the characteristic values used in Equation A.1. The reason for introducing the present scales is so that we can immediately use some of the non-dimensionalized parameters from (4). In particular,  $D'_e$  (which we take to be the same as  $D'_p$ ) is equal to 1. Note also that  $\frac{k_m b_0}{2\lambda_m}$  represents the balanced amount of macrophage when  $p = K_p$ .

We nondimensionalize the parameters using the above scaling,

$$\begin{aligned} \{L', R'_0, K'_R\} &= \frac{1}{L_0} \{L, R_0, K_R\}, & \{K'_{w\rho}, K'_{wf}, w'_b\} &= \frac{1}{w_0} \{K_{w\rho}, K_{wf}, w_b\} \\ \rho'_m &= \frac{\rho_m}{\rho_0}, & \beta' &= \frac{\beta}{\eta/T_0}, & k'_\rho &= \frac{k_\rho f_0 T_0}{\rho_0}, & \lambda'_\rho &= \lambda_\rho T_0, \\ \{D'_w, D'_e, D'_p, D'_m, D'_f, D'_n, D'_b\} &= \frac{T_0}{L_0^2} \{D_w, D_e, D_p, D_m, D_f, D_n, D_b\}, \\ \{\chi'_m, \chi'_f, \chi'_n\} &= \frac{T_0}{L_0^2} \{\chi_m K_p, \chi_f K_p, \chi_n K_e\}, \\ \{k'_w, \lambda'_{wf}, \lambda'_{wm}\} &= T_0 \{k_w b_0, \lambda_{wf} f_0, \lambda_{wm} m_0\}, \\ \{k'_p, \lambda'_p, k'_{pb}, k'_e, \lambda'_{en}, \lambda'_{eb}, \lambda'_e\} &= T_0 \left\{ k_p \frac{m_0}{K_p}, \lambda_p, k_{pb} \frac{1}{L_0 K_p}, k_e \frac{m_0}{K_e}, \lambda_{en} b_0, \lambda_{eb} b_0, \lambda_e \right\}, \\ \{\lambda'_m, k'_f, \lambda'_f, k'_{nb}, k'_n, \lambda'_{nb}, \lambda'_{nn}\} &= T_0 \{\lambda_m, k_f, \lambda_f, k_{nb}, k_n, \lambda_{nb} b_0, \lambda_{nn} b_0\}, \\ m'_m &= \frac{m_m}{m_0}, & f'_m &= \frac{f_m}{f_0}, & n'_m &= \frac{n_m}{b_0}. \end{aligned}$$

We drop the primes for simplicity of notation and further introduce the transformation

$$\xi = \frac{r - R(t)}{L - R(t)} \quad \left( r = (1 - \xi)R(t) + \xi L \right), \quad (\text{C.1})$$

which transforms the free boundary to  $\xi = 0$  and the fixed boundary to  $\xi = 1$ . With this transformation each function  $u(r, t)$  becomes  $u'(\xi, t)$ , but for simplicity we shall drop the primes. From [C.1] one can verify by directed computation that

$$\frac{\partial u}{\partial r} = \frac{1}{L - R(t)} \frac{\partial u}{\partial \xi}, \quad (\text{C.2})$$

$$\frac{\partial}{\partial r} \left( r \frac{\partial u}{\partial r} \right) = \frac{1}{(L - R(t))^2} \frac{\partial}{\partial \xi} \left( r(\xi) \frac{\partial u}{\partial \xi} \right), \quad (\text{C.3})$$

$$\frac{\partial u}{\partial t} \Big|_x = \frac{\partial u}{\partial t} \Big|_\xi + \frac{\partial u}{\partial \xi} \Big|_t \frac{\partial \xi}{\partial t} \Big|_x = \frac{\partial u}{\partial t} \Big|_\xi + \frac{R'(t)}{L - R(t)} (\xi - 1) \frac{\partial u}{\partial \xi}, \quad (\text{C.4})$$

$$(\xi - 1) \frac{\partial u}{\partial \xi} = \frac{1}{r} \frac{\partial}{\partial \xi} \left( r(\xi - 1) u \right) + \left( \frac{(1 - \xi)(L - R(t))}{r} - 1 \right) u. \quad (\text{C.5})$$

Using these equations and setting

$$K = K(\xi) = \frac{R'(t)}{L - R(t)} \left( \frac{(1 - \xi)(L - R(t))}{r} - 1 \right), \quad (\text{C.6})$$

we obtain

$$\frac{\partial u}{\partial t} \Big|_x + \frac{1}{r} \frac{\partial}{\partial r} (ruv) = \frac{\partial u}{\partial t} \Big|_\xi + B,$$

where, by [C.2] and [C.4] ,

$$B = \frac{R'(t)}{L-R(t)}(\xi-1)\frac{\partial u}{\partial \xi} + \frac{1}{(L-R(t))r}\frac{\partial}{\partial \xi}(ruv).$$

Then by [C.5] and [C.6] ,

$$\begin{aligned} B &= \frac{R'(t)}{L-R(t)}\frac{1}{r}\frac{\partial}{\partial \xi}\left(r(\xi-1)u\right) + \frac{1}{(L-R(t))r}\frac{\partial}{\partial \xi}(ruv) + Ku \\ &= \frac{1}{L-R(t)}\left[\frac{1}{r}\frac{\partial}{\partial \xi}\left(ru(R'(t)(\xi-1)+v)\right)\right] + Ku. \end{aligned}$$

Hence

$$\frac{\partial u}{\partial t}\Big|_x + \frac{1}{r}\frac{\partial}{\partial r}(ruv) = \frac{1}{L-R(t)}\left[\frac{1}{r}\frac{\partial}{\partial \xi}\left(ru(R'(t)(\xi-1)+v)\right)\right] + Ku. \quad (\text{C.7})$$

Using [C.7] and [C.3] we obtain the following system with the new variable  $\xi$ ,

$$\frac{\partial \rho}{\partial t} + \frac{1}{L-R(t)}\left[\frac{1}{r}\frac{\partial}{\partial \xi}\left(r\rho(R'(t)(\xi-1)+v)\right)\right] = \frac{k_\rho w}{w+K_{w\rho}}f\left(1-\frac{\rho}{\rho_m}\right) - \lambda_\rho\rho - K\rho, \quad (\text{C.8})$$

$$\frac{1}{(L-R(t))^2}\frac{1}{r}\frac{\partial}{\partial \xi}\left(r\frac{\partial v}{\partial \xi}\right) - \frac{v}{r^2} = \frac{1}{L-R(t)}\frac{\partial P}{\partial \xi}, \quad (\text{C.9})$$

$$\begin{aligned} \frac{\partial w}{\partial t} + \frac{1}{L-R(t)}\left[\frac{1}{r}\frac{\partial}{\partial \xi}\left(rw(R'(t)(\xi-1)+v)\right)\right] &= \frac{D_w}{(L-R(t))^2}\left[\frac{1}{r}\frac{\partial}{\partial \xi}\left(r\frac{\partial w}{\partial \xi}\right)\right] \\ &+ k_w b((1-\alpha)w_b - w) - \left[(\lambda_{wf}f + \lambda_{wm}m)\left(1 + \frac{\lambda_{ww}p}{1+p}\right) + \lambda_{wm}\right]w - Kw, \end{aligned} \quad (\text{C.10})$$

$$\begin{aligned} \frac{\partial p}{\partial t} + \frac{1}{L-R(t)}\left[\frac{1}{r}\frac{\partial}{\partial \xi}\left(rp(R'(t)(\xi-1)+v)\right)\right] &= \frac{D_p}{(L-R(t))^2}\left[\frac{1}{r}\frac{\partial}{\partial \xi}\left(r\frac{\partial p}{\partial \xi}\right)\right] \\ &+ k_p m G_p(w) - \frac{\lambda_{pf}fp}{1+p} - \lambda_p p - Kp, \end{aligned} \quad (\text{C.11})$$

$$\begin{aligned} \frac{\partial e}{\partial t} + \frac{1}{L-R(t)}\left[\frac{1}{r}\frac{\partial}{\partial \xi}\left(re(R'(t)(\xi-1)+v)\right)\right] &= \frac{D_e}{(L-R(t))^2}\left[\frac{1}{r}\frac{\partial}{\partial \xi}\left(r\frac{\partial e}{\partial \xi}\right)\right] \\ &+ k_e m G_e(w) - (\lambda_{en}n + \lambda_{eb}b + \lambda_e)e - Ke, \end{aligned} \quad (\text{C.12})$$

$$\begin{aligned} \frac{\partial m}{\partial t} + \frac{1}{L-R(t)}\left[\frac{1}{r}\frac{\partial}{\partial \xi}\left(rm(R'(t)(\xi-1)+v)\right)\right] \\ &= \frac{1}{(L-R(t))^2}\left[\frac{1}{r}\frac{\partial}{\partial \xi}\left(r\left(D_m\frac{\partial m}{\partial \xi} - \chi_m\rho m H(m_m - m)\frac{\partial p}{\partial \xi}\right)\right)\right] \\ &+ \frac{k_m bp}{1+p} - \lambda_m m(1 + \lambda_d D(w)) - Km, \end{aligned} \quad (\text{C.13})$$

$$\begin{aligned} \frac{\partial f}{\partial t} + \frac{1}{L-R(t)}\left[\frac{1}{r}\frac{\partial}{\partial \xi}\left(rf(R'(t)(\xi-1)+v)\right)\right] \\ &= \frac{1}{(L-R(t))^2}\left[\frac{1}{r}\frac{\partial}{\partial \xi}\left(r\left(D_f\frac{\partial f}{\partial \xi} - \chi_f\rho f H(f_m - f)\frac{\partial p}{\partial \xi}\right)\right)\right] \\ &+ k_f G_f(w)f\left(1 - \frac{f}{f_m}\right) - \lambda_f f(1 + \lambda_d D(w)) - Kf, \end{aligned} \quad (\text{C.14})$$

$$\begin{aligned}
\frac{\partial n}{\partial t} + \frac{1}{L - R(t)} \left[ \frac{1}{r} \frac{\partial}{\partial \xi} \left( rn(R'(t)(\xi - 1) + v) \right) \right] \\
= \frac{1}{(L - R(t))^2} \left[ \frac{1}{r} \frac{\partial}{\partial \xi} \left( r \left( D_n \frac{\partial n}{\partial \xi} - \chi_f \rho n H(n_m - n) \frac{\partial e}{\partial \xi} \right) \right) \right] \\
+ (k_{nb}b + k_n n) \frac{e}{1 + e} - (\lambda_{nb}b + \lambda_{nn}n)n - Kn, \tag{C.15}
\end{aligned}$$

$$\begin{aligned}
\frac{\partial b}{\partial t} + \frac{1}{L - R(t)} \left[ \frac{1}{r} \frac{\partial}{\partial \xi} \left( rb(R'(t)(\xi - 1) + v) \right) \right] \\
= \frac{1}{(L - R(t))^2} \left[ \frac{1}{r} \frac{\partial}{\partial \xi} \left( r \left( D_b \frac{\partial b}{\partial \xi} + AD_n b \frac{\partial n}{\partial \xi} - A\chi_{nb} b \rho n H(n_m - n) \frac{\partial e}{\partial \xi} \right) \right) \right] \\
+ k_b G_b(w)b(1 - b) + (\lambda_{nb}b + \lambda_{nn}n)n - Kb, \tag{C.16}
\end{aligned}$$

$$\dot{R}(t) = v(R(t), t). \tag{C.17}$$

where

$$\begin{aligned}
K = K(\xi) &= \frac{R'(t)}{L - R(t)} \left( \frac{(1 - \xi)(L - R(t))}{r} - 1 \right), \\
G_p(w) &= \begin{cases} 3w, & 0 \leq w < 0.5 \\ 2 - w, & 0.5 \leq w < 1 \\ \frac{1}{3}w + \frac{2}{3}, & 1 \leq w < 4 \\ 2, & w \geq 4 \end{cases}, \quad G_e(w) = \begin{cases} 2w, & 0 \leq w < 0.5, \\ 2 - 2w, & 0.5 \leq w < 1, \\ \frac{1}{3}w - \frac{1}{3}, & 1 \leq w < 4, \\ 1, & w \geq 4 \end{cases}, \\
G_f(w) &= \frac{2w}{w + K_{wf}}, \quad G_b = \frac{2w}{w + K_{wb}}, \quad D(w) = 1 - H(w - 0.2)H(3 - w).
\end{aligned}$$

The boundary conditions at the fixed boundary  $\xi = 1$  become

$$v = 0, \tag{C.18}$$

$$(1 - \alpha)(w - 1) + \frac{\alpha L}{L - R(t)} \frac{\partial w}{\partial \xi} = 0, \tag{C.19}$$

$$(1 - \alpha)p + \frac{\alpha L}{L - R(t)} \frac{\partial p}{\partial \xi} = 0, \tag{C.20}$$

$$(1 - \alpha)e + \frac{\alpha L}{L - R(t)} \frac{\partial e}{\partial \xi} = 0, \tag{C.21}$$

$$(1 - \alpha)m + \frac{\alpha L}{L - R(t)} \left( \frac{\partial m}{\partial \xi} - \frac{\chi_m}{D_m} \rho m H(m_m - m) \frac{\partial p}{\partial \xi} \right) = 0, \tag{C.22}$$

$$(1 - \alpha)(f - 1) + \frac{\alpha L}{L - R(t)} \left( \frac{\partial f}{\partial \xi} - \frac{\chi_f}{D_f} \rho f H(f_m - f) \frac{\partial p}{\partial \xi} \right) = 0, \tag{C.23}$$

$$(1 - \alpha)n + \frac{\alpha L}{L - R(t)} \left( \frac{\partial n}{\partial \xi} - \frac{\chi_n}{D_n} \rho n H(n_m - n) \frac{\partial p}{\partial \xi} \right) = 0, \tag{C.24}$$

$$(1 - \alpha)(b - 1) + \frac{\alpha L}{L - R(t)} \frac{\partial b}{\partial \xi} - (1 - \alpha) \frac{AD_n}{D_b} bn = 0, \tag{C.25}$$

and at the free boundary  $\xi = 0$  are

$$\frac{\partial v}{\partial \xi} = (L - R(t))P, \tag{C.26}$$

$$\frac{\partial w}{\partial \xi} = \frac{\partial e}{\partial \xi} = \frac{\partial n}{\partial \xi} = \frac{\partial b}{\partial \xi} = 0, \tag{C.27}$$

$$\frac{\partial p}{\partial \xi} = -\frac{k_{pb}R}{D_p R_0} (L - R(t)), \tag{C.28}$$

$$-D_m \frac{\partial m}{\partial \xi} + \chi_m \rho m H(m_m - m) \frac{\partial p}{\partial \xi} = 0, \tag{C.29}$$

$$-D_f \frac{\partial f}{\partial \xi} + \chi_f \rho f H(f_m - f) \frac{\partial p}{\partial \xi} = 0. \tag{C.30}$$

The initial conditions take the form

$$\begin{aligned} R(0) = 0, v = 0, \rho = f = 1, w = 1 - \alpha, b = g\left(\frac{\xi(L - R_0)}{\epsilon}\right), \\ e = m = n = 0, p = \max\left\{0, \frac{k_{pb}}{D_p}\left(\epsilon - \xi(L - R_0)\right)\right\}. \end{aligned} \tag{C.31}$$

## D Parameters of the model

Most of the parameters in Table S1 are obtained from the literature cited; the remaining parameters are estimated as described below. Proteins make up about a quarter of body volume, and the dermal tissue protein is mainly ECM protein (5), therefore  $\rho_0$  is approximately 0.25. We assume that the maximally allowed ECM volume fraction is  $2\rho_0$ , therefore  $\rho_m$  is estimated as 0.5. We assume that when  $\rho > \rho_0$ , the ECM pressure depends on its density linearly with rate  $\beta = 10$ , which means that if ECM is compressed to twice its normal density  $\rho_0$  and released immediately afterwards, it will relax to  $\rho_0$  in about two hours. This is estimated from the one dimensional ECM equation with no growth term and surface force

$$\begin{aligned}\frac{\partial \rho}{\partial t} + \frac{\partial(\rho v)}{\partial x} &= 0, \quad \rho(0) = 2, \\ \frac{\partial v}{\partial x} &= \beta(\rho - 1)_+ \quad v(0, t) = 0.\end{aligned}$$

whose solution satisfies  $v(x, t) = \beta x(\rho - 1)_+$  and  $\rho = \rho(t) = 1/(1 - 0.5e^{-\beta t})$ , with  $\rho(0) = 2$  and  $\rho(2 \text{ hours}) \approx 1.02$ .

In healthy tissue, there is no net growth of ECM, i.e.,  $G_\rho(f_0, w_0, \rho_0) = 0$ , therefore we can solve for  $\lambda_\rho$  and obtain

$$\lambda_\rho = \frac{k_\rho w_0 f_0}{w_0 + K_{w\rho}} \left( \frac{1}{\rho_0} - \frac{1}{\rho_m} \right). \quad (\text{D.1})$$

Similarly, the transfer rate of oxygen from blood to tissue,  $k_w$ , is taken such that, at homeostasis, tissue oxygen net growth is zero, therefore we can solve, from the equation for  $w$ ,

$$k_w = \frac{(\lambda_{wf} f_0 + \lambda_{wm}) m_0 w_0}{b_0(w_b - w_0)}. \quad (\text{D.2})$$

Also, the maximum growth rate of fibroblast  $k_f$  is taken so that in normal healthy tissue fibroblasts is at steady state  $f_0$ , so that, using the equation for  $f$ ,

$$k_f = \frac{\lambda_f}{1 - f_0/f_m}. \quad (\text{D.3})$$

Note that the process  $p \rightarrow m \rightarrow p$  is autocatalytic. In homeostasis this process should be such that the density of the activated macrophages is  $m = 0$  and therefore also  $p = 0$ . A steady state of  $(p, m)$  is the intersection of the two nullclines of the equations for  $p$  and  $m$ , namely,  $k_p m = \frac{\lambda_{pf} p}{K_p + p} + \lambda_p p$  and  $\frac{k_m p}{K_p + p} = \lambda_m m$ . For simplicity, we assume homeostasis is the only steady state, i.e., the only intersection of the two nullclines. This is satisfied if and only if  $\frac{k_m k_p}{\lambda_m} < \lambda_p + \lambda_{pf}$ , and the parameter  $k_p$  is chosen to abide by this inequality.

We assume that the random motility of fibroblasts in the wound healing environment is the same as that of macrophages, i.e.,  $D_f = D_m$ , which is much smaller than that of soluble chemicals but a little larger than that of blood vessels. As in (4), we estimate the maximum volume fraction of macrophages, fibroblasts and capillary tips in the wound to be 1%, so that we can take  $m_m = f_m = n_m = 10^{-2} \text{ g}\cdot\text{cm}^{-3}$ . As in (4), we assume that the oxygen consumption rate by fibroblasts is smaller than that by macrophages, and  $\lambda_{wf} = \lambda_{wm}/15$ . We also assume that the extra oxygen consumption rate by the skin tissue due to the wound,  $\lambda_{ww}$  (which is a nondimensional parameter), is equal to 2, i.e., when normalized  $p$  is equal to 1, the effect of  $p$  is to double the intake of oxygen by fibroblasts and by activated macrophages. We assume that the growth rate of fibroblast has the same dependence on oxygen as the synthesis of ECM, i.e.,  $K_{w\rho} = K_{wf}$ . The boundary flux parameter  $k_{pb}$  is chosen so that the normal wound heals in 10 – 15 days post wounding as observed experimentally (11). We choose the differentiation rate of monocytes to macrophages,  $k_m$ , such that the maximum macrophage in the wound is 6 times that of the healthy tissue, i.e.,  $k_m = \frac{6\lambda_m m_0}{b_0}$ . We assume that under extreme hypoxia or hyperoxia, the death rates of cells are three times that under normoxia, i.e.,  $\lambda_d = 2$ . If we increase  $L$  to  $2L$ , simulation results do not change appreciably.



Table S1: Table of dimensional and nondimensionalized parameters.

| Notation       | Dimensional                                             | Nondim                | Source       |
|----------------|---------------------------------------------------------|-----------------------|--------------|
| $L_0$          | 0.15 cm                                                 | 1                     | (4)          |
| $T_0$          | 6.25 h                                                  | 1                     | (4)          |
| $\rho_0$       | 0.25                                                    | 1                     | (5)          |
| $w_0$          | 100 mmHg                                                | 1                     | (6)          |
| $K_p$          | $10^{-8}$ g·cm $^{-3}$                                  | 1                     | (4, 7)       |
| $K_e$          | $10^{-8}$ g·cm $^{-3}$                                  | 1                     | (4, 7)       |
| $m_0$          | $10^{-3}$ g·cm $^{-3}$                                  | 1                     | (4, 7)       |
| $f_0$          | $10^{-3}$ g·cm $^{-3}$                                  | 1                     | (4, 8)       |
| $b_0$          | $10^{-3}$ g·cm $^{-3}$                                  | 1                     | (4, 9, 10)   |
| $L^*$          | 0.75 cm                                                 | 5                     | (11)         |
| $R_0$          | 0.4 cm                                                  | 8/3                   | (11)         |
| $\rho_m$       | 0.5                                                     | 2                     | Estimated    |
| $K_{w\rho}$    | 25 mmHg                                                 | 0.25                  | (6, 12–14)   |
| $K_{wf}$       |                                                         | 0.25                  | Estimated    |
| $k_\rho$       |                                                         | 5/16                  | (4)          |
| $\lambda_\rho$ |                                                         | 0.1                   | Eqn [D.1]    |
| $\beta$        |                                                         | 10                    | Estimated    |
| $D_w$          | $5 \times 10^{-7}$ cm $^2$ /s                           | 0.5                   | (15)         |
| $D_p$          | $10^{-6}$ cm $^2$ /s                                    | 1                     | (16, 17)     |
| $D_e$          | $10^{-6}$ cm $^2$ /s                                    | 1                     | (16, 17)     |
| $D_m$          |                                                         | $5 \times 10^{-2}$    | (4)          |
| $D_f$          |                                                         | $5 \times 10^{-2}$    | Estimated    |
| $D_n$          | $10^{-9}$ cm $^2$ /s                                    | $10^{-3}$             | (16, 18)     |
| $D_b$          | $7 \times 10^{-10}$ cm $^2$ /s                          | $7 \times 10^{-4}$    | (17, 19)     |
| $\chi_m$       |                                                         | 0.1                   | (4)          |
| $\chi_f$       | 10-500 cm $^5$ g $^{-1}$ s $^{-1}$                      | 0.1                   | (8)          |
| $\chi_n$       | 1-100 cm $^5$ g $^{-1}$ s $^{-1}$                       | 1                     | (16, 20)     |
| $m_m$          | $10^{-2}$ g·cm $^{-3}$                                  | 10                    | (4)          |
| $f_m$          | $10^{-2}$ g·cm $^{-3}$                                  | 10                    | (4)          |
| $n_m$          | $10^{-2}$ g·cm $^{-3}$                                  | 10                    | (4)          |
| $A$            |                                                         | 0.1                   | (4)          |
| $w_b$          | 200 mmHg                                                | 2                     | (6)          |
| $k_w$          |                                                         | 4.39                  | Eqn [D.2]    |
| $\lambda_{wf}$ |                                                         | 0.227                 | (4, 21)      |
| $\lambda_{wm}$ | 0.185 cm $^3$ g $^{-1}$ s $^{-1}$                       | 4.16                  | (4, 21)      |
| $\lambda_{ww}$ |                                                         | 2                     | Estimated    |
| $k_p$          |                                                         | 1.5                   | Estimated    |
| $\lambda_{pf}$ |                                                         | 9                     | Estimated    |
| $\lambda_p$    | $4 \times 10^{-5}$ s $^{-1}$                            | 0.9                   | (4)          |
| $k_{pb}$       |                                                         | 4                     | Estimated    |
| $k_e$          |                                                         | 50                    | (4)          |
| $\lambda_{en}$ |                                                         | 90                    | (4)          |
| $\lambda_{eb}$ | 4 cm $^3$ g $^{-1}$ s $^{-1}$                           | 90                    | (22, 23)     |
| $\lambda_e$    | $4 \times 10^{-5}$ s $^{-1}$                            | 0.9                   | (24, 25)     |
| $k_m$          |                                                         | $2.7 \times 10^{-1}$  | Estimated    |
| $\lambda_m$    | $2 \times 10^{-6}$ s $^{-1}$                            | $4.5 \times 10^{-2}$  | (4, 26)      |
| $\lambda_d$    |                                                         | 2                     | Estimated    |
| $k_f$          |                                                         | $5.78 \times 10^{-3}$ | Eqn [D.3]    |
| $\lambda_f$    | $2.31 \times 10^{-7}$ s $^{-1}$                         | $5.2 \times 10^{-3}$  | (27)         |
| $k_{nb}$       |                                                         | $2.16 \times 10^{-2}$ | (4)          |
| $k_n$          |                                                         | $2.16 \times 10^{-2}$ | (4, 21)      |
| $k_b$          | $5.56 \times 10^{-6}$ - $1.56 \times 10^{-5}$ s $^{-1}$ | $2.25 \times 10^{-1}$ | (19, 20, 28) |
| $\lambda_{nn}$ | $10^{-1}$ cm $^3$ g $^{-1}$ s $^{-1}$                   | 2.25                  | (18)         |
| $\lambda_{nb}$ | $10^{-3}$ cm $^3$ g $^{-1}$ s $^{-1}$                   | $2.25 \times 10^{-2}$ | (18)         |

\* By increasing  $L$  the results don not change appreciably.

## E Time evolution figures

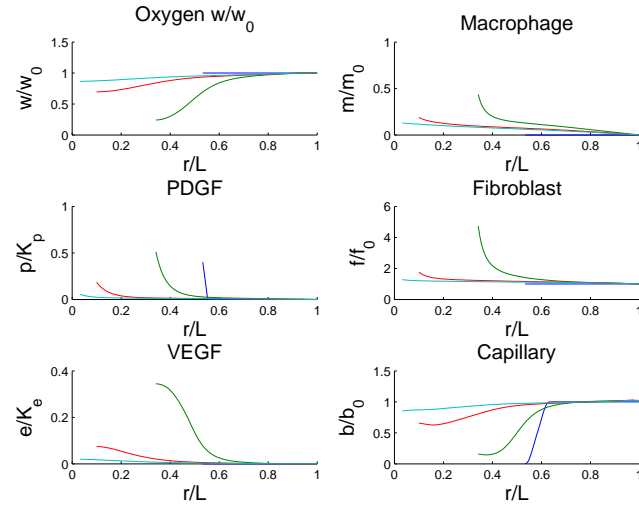

Figure S1: Normal wound healing ( $\alpha = 0$ ): spatial distribution of cells and chemokines at different times. Blue:  $t = 0$ ; green:  $t = 5$ ; red:  $t = 10$ ; cyan:  $t = 12.5$ .

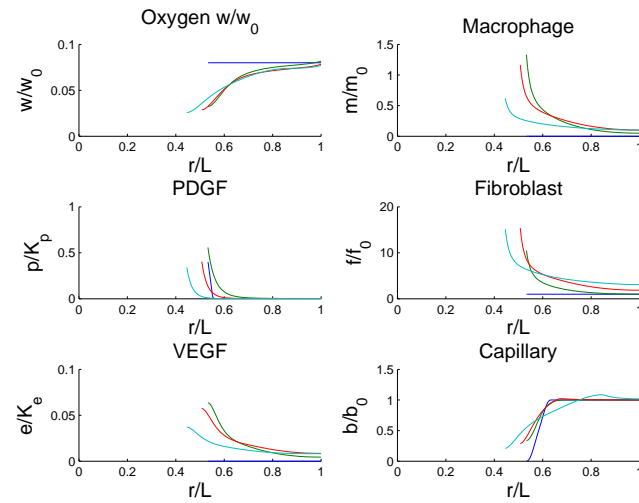

Figure S2: Ischemic wound healing ( $\alpha = 0.88$ ): spatial distribution of cells and chemokines at different times. Blue:  $t = 0$ ; green:  $t = 5$ ; red:  $t = 10$ ; cyan:  $t = 15$ ; yellow:  $t = 20$ .

## References

- [1] Knapp DM, Barocas VH, Moon AG (1997) Rheology of reconstituted type I collagen gel in confined compression. *J. Rheol.* 41:971–993.
- [2] Barocas VH, Tranquillo R (1997) An anisotropic biphasic theory of tissue-equivalent mechanics: the interplay among cell traction, fibrillar network, deformation, fibril alignment, and cell contact guidance. *Journal of Biomechanical Engineering* 119:137–145.
- [3] Panton RL (1996) *Incompressible Flow* (Wiley-Interscience), 2 edition.
- [4] Schugart RC, Friedman A, Zhao R, Sen CK (2008) Wound angiogenesis as a function of tissue oxygen tension: A mathematical model. *PNAS* 105:2628–2633.
- [5] Lullo GAD, Sweeney SM, Korkko J, Ala-Kokko L, Antonio JDS (2002) Mapping the ligand-binding sites and disease-associated mutations on the most abundant protein in the human, type I Collagen. *J. Biol. Chem.* 277:4223–4231.
- [6] Gordillo GM, Sen CK (2003) Revisiting the essential role of oxygen in wound healing. *Am. J. Surg.* 186:259–263.
- [7] Nagaoka T et al. (2000) Delayed wound healing in the absence of intercellular adhesion molecule-1 or L-selectin expression. *Am J Pathol.* 157:237–247.
- [8] Olsen L, Sherratt JA, Maini PK (1995) A mechanochemical model for adult dermal wound contraction and the permanence of the contracted tissue displacement profile. *Journal of Theoretical Biology* 177:113 – 128.
- [9] Namy P, Ohayon J, Tracqui P (2004) Critical conditions for pattern formation and *in vitro* tubulogenesis driven by cellular traction fields. *Journal of Theoretical Biology* 227:103 – 120.
- [10] Montminy J [http://focus.hms.harvard.edu/2000/Sep15\\_2000/opthalmology.html](http://focus.hms.harvard.edu/2000/Sep15_2000/opthalmology.html).
- [11] Roy S et al. (2009) Characterization of a pre-clinical model of chronic ischemic wound. *Physiol Genomics*.
- [12] Hutton J, Tappel A, Udenfriend S (1967) Cofactor and substrate requirements of collagen proline hydroxylase. *Arch Biochem Biophys* 118:231–40.
- [13] Myllyla R, Tuderman L, Kivirikko KI (1977) Mechanism of the prolyl hydroxylase reaction. *European Journal of Biochemistry* 80:349–357.
- [14] Sen CK (2009) Wound healing essentials: Let there be oxygen. *Wound Repair and Regeneration* 17:1–18.
- [15] Owen MR, Byrne HM, Lewis CE (2004) Mathematical modelling of the use of macrophages as vehicles for drug delivery to hypoxic tumour sites. *Journal of Theoretical Biology* 226:377 – 391.
- [16] Pettet GJ, Byrne HM, McElwain DLS, Norbury J (1996) A model of wound-healing angiogenesis in soft tissue. *Mathematical Biosciences* 136:35 – 63.
- [17] Stokes CL, Lauffenburger DA, Williams SK (1991) Migration of individual microvessel endothelial cells: stochastic model and parameter measurement. *J Cell Sci* 99:419–430.
- [18] Gaffney E, Pugh K, Maini PK, Arnold F (2002) Investigating a simple model of cutaneous wound healing angiogenesis. *Journal of Mathematical Biology* 45:337–374.
- [19] Sherratt JA, Murray JD (1990) Models of epidermal wound healing. *Proceedings: Biological Sciences* 241:29–36.
- [20] Stokes CL, Lauffenburger DA (1991) Analysis of the roles of microvessel endothelial cell random motility and chemotaxis in angiogenesis. *J Theor. Biol.* 152:377–403.
- [21] James PE, Jackson SK, Grinberg OY, Swartz HM (1995) The effects of endotoxin on oxygen consumption of various cell types in vitro: An epr oximetry study. *Free Radical Biology and Medicine* 18:641 – 647.
- [22] Baldwin ME et al. (2001) The specificity of receptor binding by vascular endothelial growth factor-D is different in mouse and man. *J. Biol. Chem.* 276:19166–19171.

- [23] Makinen T et al. (2001) Isolated lymphatic endothelial cells transduce growth, survival and migratory signals via the VEGF-C/D receptor VEGFR-3. *EMBO J.* 20:4762–4773.
- [24] Enholm B et al. (1997) Comparison of VEGF, VEGF-B, VEGF-C and Ang-1 mRNA regulation by serum, growth factors, oncoproteins and hypoxia. *Oncogene.* 14:2475–83.
- [25] Ristimaki A et al. (1998) Proinflammatory cytokines regulate expression of the lymphatic endothelial mitogen vascular endothelial growth factor-C. *J. Biol. Chem.* 273:8413–8418.
- [26] Blankson J, Persaud D, Siliciano RF (1999) Latent reservoirs for HIV-1. *Current Opinion in Infectious Diseases* 12:5–11.
- [27] Cohen IK, Diegelmann RF, Lindblad WJ, eds (1992) *Wound Healing: Biochemical and Clinical Aspects* (W.B. Saunders).
- [28] Chaplain MAJ (1996) Avascular growth, angiogenesis and vascular growth in solid tumours: The mathematical modeling of the stages of tumour development. *Mathl. Comput. Modeling* 23:47–87.
